# Supplementary material
Source: PubMed Central journal article supplement (PMC2096739)
Supplement: ijbsv03p0486s1.pdf [file ijbsv03p0486s1.pdf]

Primers used in the qRT-PCR for verification of  
COBRA1/BRCA1-regulated genes.

| Gene Symbol | LPE.1vs4 | pvalue.1vs4 | LPE.1vs2 | pvalue.1vs2 | LPE.1vs3 | pvalue.1vs3 |
|-------------|----------|-------------|----------|-------------|----------|-------------|
| IFITM1      | -14.1755 | 0           | -8.5772  | 0           | -4.1082  | 0           |
| MX1         | -14.7596 | 0           | -10.9318 | 0           | -3.9117  | 0.0001      |
| IFI27       | -10.5628 | 0           | -7.4698  | 0           | -4.1002  | 0           |
| IFITM1      | -10.9131 | 0           | -7.3016  | 0           | -4.129   | 0           |
| IFIT1       | -6.6519  | 0           | -4.9001  | 0           | -1.627   | 0.1037      |
| G1P2        | -14.6698 | 0           | -10.9304 | 0           | -2.5434  | 0.011       |
| ISGF3G      | -7.1744  | 0           | -5.6185  | 0           | -3.3232  | 0.0009      |
| G1P3        | -10.4834 | 0           | -9.0281  | 0           | -5.4383  | 0           |
| STAT1       | -4.8983  | 0           | -3.7799  | 0.0002      | 0.5583   | 0.5766      |
| IER3        | 7.6221   | 0           | 6.1108   | 0           | -1.1233  | 0.2613      |
| MTHFD2      | 3.6222   | 0.0003      | 4.5735   | 0           | -0.1135  | 0.9097      |
| STC2        | 5.268    | 0           | 4.5518   | 0           | -1.1138  | 0.2654      |
| PIP         | -9.3263  | 0           | -11.5108 | 0           | -2.316   | 0.0206      |
| ATP2A3      | -3.5911  | 0.0003      | -4.5553  | 0           | 1.471    | 0.1413      |
| UCP2        | -4.0448  | 0.0001      | -3.3717  | 0.0007      | 0.2397   | 0.8106      |
| SERPINA1    | -4.6465  | 0           | -4.8578  | 0           | 0.0127   | 0.9899      |
| HLA-G       | -5.4875  | 0           | -4.1968  | 0           | -0.4975  | 0.6188      |
| K-ALPHA-1   | 4.1211   | 0           | 4.7641   | 0           | 1.0386   | 0.299       |
| HLA-C       | -3.0994  | 0.0019      | -4.5071  | 0           | 1.6832   | 0.0923      |
| APP         | -7.5956  | 0           | -5.3694  | 0           | -2.0074  | 0.0447      |
| FLJ22329    | 3.558    | 0.0004      | 3.5758   | 0.0003      | -0.2709  | 0.7865      |
| NGLY1       | 3.9732   | 0.0001      | 4.3812   | 0           | 0.5758   | 0.5648      |
| TFF3        | -8.6995  | 0           | -0.6241  | 0.5326      | -5.105   | 0           |
| GAGE7B      | -5.8     | 0           | -1.0015  | 0.3166      | -12.6051 | 0           |
| GAGE4       | -4.0401  | 0.0001      | 0.9481   | 0.3431      | -10.8399 | 0           |
| CRABP2      | -5.8362  | 0           | 3.1696   | 0.0015      | -4.755   | 0           |
| TYMS        | 8.4804   | 0           | 4.624    | 0           | 8.9655   | 0           |
| SATB1       | -5.5178  | 0           | 3.0205   | 0.0025      | -5.9259  | 0           |
| HIST2H2AA   | -7.7193  | 0           | -3.1087  | 0.0019      | -10.3951 | 0           |
| EPRS        | -4.4249  | 0           | -0.3252  | 0.7451      | -5.4163  | 0           |
| PPIB        | 5.5063   | 0           | 0.0819   | 0.9348      | 4.2679   | 0           |
| TXNIP       | -4.0466  | 0.0001      | 0.6781   | 0.4977      | -3.352   | 0.0008      |
| TXNIP       | -4.3482  | 0           | 0.4476   | 0.6544      | -3.7296  | 0.0002      |
| NPEPPS      | 4.33     | 0           | 0.345    | 0.7301      | 6.4491   | 0           |
| APOD        | -9.2781  | 0           | -1.221   | 0.2221      | -8.2544  | 0           |
| TIMP1       | -8.2066  | 0           | -0.0369  | 0.9706      | -6.7933  | 0           |
| EPHX1       | -5.2324  | 0           | -0.2707  | 0.7866      | -5.0305  | 0           |
| MGP         | -8.3168  | 0           | 1.0209   | 0.3073      | -6.3136  | 0           |
| EEF1A2      | -7.7679  | 0           | -1.6057  | 0.1083      | -6.1427  | 0           |
| SPINK5      | 7.0054   | 0           | 1.4439   | 0.1488      | 8.5459   | 0           |
| H3F3A       | -3.7828  | 0.0002      | -0.476   | 0.6341      | -6.2442  | 0           |
| SNCG        | -8.0425  | 0           | -2.2512  | 0.0244      | -6.178   | 0           |
| RNU2        | -6.4905  | 0           | -2.3734  | 0.0176      | -5.9621  | 0           |
| PTGES       | -4.347   | 0           | 2.6299   | 0.0085      | -5.0214  | 0           |
| KYNU        | -4.3053  | 0           | -0.3129  | 0.7544      | -3.719   | 0.0002      |
| JMJD2B      | -5.1267  | 0           | 0.5319   | 0.5948      | -3.156   | 0.0016      |
| C14orf32    | 5.7752   | 0           | 1.402    | 0.1609      | 5.8011   | 0           |
| AKIP        | -6.2253  | 0           | -1.5206  | 0.1284      | -4.8151  | 0           |

|           |          |        |         |        |         |        |
|-----------|----------|--------|---------|--------|---------|--------|
| H3F3A     | -3.9306  | 0.0001 | -0.588  | 0.5565 | -5.2869 | 0      |
| FXYD5     | -5.7303  | 0      | -0.669  | 0.5035 | -4.6606 | 0      |
| WDR26     | -4.2415  | 0      | 1.3079  | 0.1909 | -3.6013 | 0.0003 |
| CLDN1     | -5.4451  | 0      | 0.3074  | 0.7586 | -3.7811 | 0.0002 |
| HIST2H2AA | -4.7909  | 0      | -0.9487 | 0.3428 | -6.9715 | 0      |
| BST2      | -8.5562  | 0      | -3.9779 | 0.0001 | -3.506  | 0.0005 |
| UBE2L6    | -8.9547  | 0      | -5.0211 | 0      | -5.4296 | 0      |
| CKS2      | 9.4579   | 0      | 4.5381  | 0      | 4.8534  | 0      |
| DUT       | 8.1509   | 0      | 3.2145  | 0.0013 | 4.7958  | 0      |
| ANXA2     | 6.3201   | 0      | -0.8261 | 0.4088 | 2.6459  | 0.0081 |
| GNAS      | 5.298    | 0      | 1.4687  | 0.1419 | -2.1418 | 0.0322 |
| IFITM3    | -11.4892 | 0      | -4.3978 | 0      | -4.9882 | 0      |
| HLA-A     | -7.1662  | 0      | -3.2956 | 0.001  | -3.1851 | 0.0014 |
| EEF1B2    | 9.0793   | 0      | 3.4528  | 0.0006 | 2.8183  | 0.0048 |
| ITM1      | 7.667    | 0      | 3.0112  | 0.0026 | 2.9517  | 0.0032 |
| OAS1      | -5.2054  | 0      | -3.3969 | 0.0007 | -1.9494 | 0.0513 |
| CD74      | -8.2633  | 0      | -3.1893 | 0.0014 | -2.0631 | 0.0391 |
| SUI1      | 6.3229   | 0      | 3.1634  | 0.0016 | 0.2449  | 0.8065 |
| OAS3      | -7.6689  | 0      | -3.1588 | 0.0016 | 0.1862  | 0.8523 |
| HLA-DRB4  | -6.0063  | 0      | -2.2518 | 0.0243 | -3.1198 | 0.0018 |
| APLP1     | -5.4628  | 0      | -2.7557 | 0.0059 | -3.3443 | 0.0008 |
| BCAS4     | 6.5257   | 0      | 0.7093  | 0.4781 | 3.4672  | 0.0005 |
| MYO5C     | 6.8806   | 0      | 0.3165  | 0.7516 | 3.2423  | 0.0012 |
| ACTG1     | 7.2735   | 0      | 2.1311  | 0.0331 | 3.8778  | 0.0001 |
| RPS11     | 3.8734   | 0.0001 | 0.4539  | 0.6499 | 0.2126  | 0.8316 |
| NPM1      | 7.1922   | 0      | 2.9466  | 0.0032 | 2.587   | 0.0097 |
| RPL4      | 7.737    | 0      | 2.9348  | 0.0033 | 2.3496  | 0.0188 |
| UBB       | 4.9987   | 0      | 0.6443  | 0.5194 | 2.2791  | 0.0227 |
| GNB2L1    | 4.3508   | 0      | 0.3328  | 0.7393 | 0.7958  | 0.4261 |
| RPL23     | 4.4234   | 0      | 0.8332  | 0.4048 | 1.0435  | 0.2967 |
| BTG1      | 4.603    | 0      | -1.2726 | 0.2032 | -1.0702 | 0.2845 |
| CALR      | -7.8525  | 0      | -0.8415 | 0.4001 | -0.6773 | 0.4982 |
| MLF2      | -5.0706  | 0      | -1.2458 | 0.2129 | -1.9319 | 0.0534 |
| GNAI2     | -5.0284  | 0      | 0.4368  | 0.6622 | -0.7058 | 0.4803 |
| RPL4      | 5.8772   | 0      | 2.1684  | 0.0301 | 0.408   | 0.6833 |
| RPS6      | 4.1486   | 0      | 1.2534  | 0.2101 | 1.1924  | 0.2331 |
| IFITM2    | -5.8855  | 0      | -2.226  | 0.026  | -1.7563 | 0.079  |
| IGFBP4    | -3.2588  | 0.0011 | 2.2275  | 0.0259 | 2.2342  | 0.0255 |
| TOMM70A   | 4.2953   | 0      | 0.6471  | 0.5176 | 0.3646  | 0.7154 |
| ANXA2     | 4.0708   | 0      | -1.0359 | 0.3002 | -0.2259 | 0.8213 |
| RPS17     | 4.9122   | 0      | 1.9759  | 0.0482 | 0.9357  | 0.3494 |
| SLC29A1   | -4.1102  | 0      | 0.4397  | 0.6602 | 1.0821  | 0.2792 |
| FLJ12443  | -3.6674  | 0.0002 | 0.1496  | 0.8811 | -0.1408 | 0.888  |
| EFEMP1    | 7.3151   | 0      | 1.4723  | 0.1409 | 2.7531  | 0.0059 |
| IMPDH2    | 6.0397   | 0      | 1.2875  | 0.1979 | 1.7572  | 0.0789 |
| RPL38     | 3.1097   | 0.0019 | -0.6353 | 0.5253 | -1.3558 | 0.1752 |
| UQCR      | 3.754    | 0.0002 | 0.2641  | 0.7917 | -0.682  | 0.4952 |
| CABIN1    | -3.61    | 0.0003 | 0.5156  | 0.6061 | -0.1109 | 0.9117 |
| PRKACA    | -4.3892  | 0      | 0.7982  | 0.4248 | -0.011  | 0.9912 |

|           |         |        |         |        |         |        |
|-----------|---------|--------|---------|--------|---------|--------|
| GAA       | -6.5176 | 0      | -1.8776 | 0.0604 | -1.5573 | 0.1194 |
| LTBR      | -3.6538 | 0.0003 | 1.3421  | 0.1796 | 0.7695  | 0.4416 |
| LU        | -5.6977 | 0      | 0.378   | 0.7055 | 1.9735  | 0.0484 |
| RPL27A    | 4.4969  | 0      | 1.2524  | 0.2104 | 1.444   | 0.1487 |
| EEF1D     | 5.7487  | 0      | 1.6572  | 0.0975 | 1.964   | 0.0495 |
| TP53I11   | -6.9049 | 0      | -2.2257 | 0.026  | -2.3539 | 0.0186 |
| IGFBP5    | -3.4182 | 0.0006 | 1.7961  | 0.0725 | 1.0661  | 0.2864 |
| LPHN1     | -3.739  | 0.0002 | -0.2138 | 0.8307 | 0.2473  | 0.8047 |
| TLL3      | -5.2799 | 0      | -1.8201 | 0.0688 | -1.2406 | 0.2148 |
| VEGFB     | -3.1334 | 0.0017 | 1.0041  | 0.3153 | 1.1438  | 0.2527 |
| RNF110    | -4.6612 | 0      | 0.5327  | 0.5942 | 0.1868  | 0.8518 |
| ACK1      | -7.546  | 0      | -0.154  | 0.8776 | -1.9377 | 0.0527 |
| GPR56     | -4.9656 | 0      | -0.5626 | 0.5737 | -1.598  | 0.1101 |
| PTK7      | -3.1457 | 0.0017 | 1.2767  | 0.2017 | 0.8766  | 0.3807 |
| MSF       | -4.3007 | 0      | -0.1557 | 0.8762 | -0.3022 | 0.7625 |
| SRRM2     | -4.4155 | 0      | 1.1336  | 0.257  | 0.2789  | 0.7803 |
| TNFRSF1A  | -4.9453 | 0      | -1.8227 | 0.0684 | 0.4938  | 0.6215 |
| NA        | 6.2689  | 0      | 2.5802  | 0.0099 | 2.5836  | 0.0098 |
| MUC1      | -9.0903 | 0      | -0.1023 | 0.9185 | -0.0476 | 0.9621 |
| DDR1      | -4.3767 | 0      | -0.4709 | 0.6377 | 0.1528  | 0.8785 |
| RPLP0     | 5.2611  | 0      | 2.2091  | 0.0272 | 0.678   | 0.4978 |
| DRPLA     | -3.9373 | 0.0001 | -0.3658 | 0.7145 | -0.219  | 0.8266 |
| CYCS      | 6.796   | 0      | 2.1284  | 0.0333 | 2.3713  | 0.0177 |
| ABCA2     | -6.3478 | 0      | 0.0891  | 0.929  | 0.0049  | 0.9961 |
| PNN       | 5.2279  | 0      | -0.2302 | 0.8179 | 0.7857  | 0.4321 |
| HMGA1     | -4.2082 | 0      | -0.0637 | 0.9492 | -0.6252 | 0.5318 |
| PTPRU     | -4.7117 | 0      | -1.0648 | 0.287  | 0.061   | 0.9514 |
| RPL4      | 4.8216  | 0      | 0.9026  | 0.3668 | -0.6618 | 0.5081 |
| ACTG1     | 5.8924  | 0      | 1.2005  | 0.2299 | 1.4994  | 0.1338 |
| GRINA     | -6.4965 | 0      | -1.2867 | 0.1982 | -2.595  | 0.0095 |
| POM121    | -3.1115 | 0.0019 | 1.78    | 0.0751 | 1.1382  | 0.255  |
| FASN      | -3.9827 | 0.0001 | 1.8399  | 0.0658 | 0.9904  | 0.322  |
| ACTG1     | 4.5253  | 0      | 1.2416  | 0.2144 | 0.9348  | 0.3499 |
| ACTG1     | 7.811   | 0      | 1.4808  | 0.1386 | 2.6122  | 0.009  |
| ANXA2     | 5.1768  | 0      | -1.9212 | 0.0547 | -0.0403 | 0.9678 |
| HNRPH1    | 4.9637  | 0      | 0.52    | 0.6031 | 0.9868  | 0.3237 |
| C6orf62   | 4.273   | 0      | -0.7601 | 0.4472 | 0.6349  | 0.5255 |
| CTBP1     | 5.3969  | 0      | 0.482   | 0.6298 | 0.3048  | 0.7606 |
| TP53I11   | -7.5844 | 0      | -1.0006 | 0.317  | -1.0826 | 0.279  |
| EVER1     | -3.3349 | 0.0009 | 0.8944  | 0.3711 | 1.8323  | 0.0669 |
| DSCR1     | 3.194   | 0.0014 | 0.0215  | 0.9829 | -0.4765 | 0.6337 |
| HLA-A     | -7.7553 | 0      | -2.6012 | 0.0093 | -0.6419 | 0.521  |
| BACH      | -3.3577 | 0.0008 | 0.8804  | 0.3787 | 1.6882  | 0.0914 |
| PRRX1     | -3.711  | 0.0002 | 0.2452  | 0.8063 | 1.4968  | 0.1344 |
| ATP5E     | 4.4422  | 0      | 0.6184  | 0.5363 | 0.8057  | 0.4204 |
| C20orf149 | -5.8388 | 0      | 0.1856  | 0.8528 | 0.1811  | 0.8563 |
| FLJ13725  | -5.0807 | 0      | 0.7088  | 0.4785 | -0.9308 | 0.352  |
| CGI-26    | 4.0532  | 0.0001 | -0.7348 | 0.4625 | -0.3534 | 0.7238 |
| C10orf70  | 4.1244  | 0      | 0.8095  | 0.4183 | 0.9473  | 0.3435 |

|          |         |        |         |        |         |        |
|----------|---------|--------|---------|--------|---------|--------|
| SEZ6L2   | -4.8486 | 0      | -0.5889 | 0.5559 | -0.675  | 0.4996 |
| NUP107   | 5.3066  | 0      | 0.7364  | 0.4615 | 1.5272  | 0.1267 |
| RAI      | -3.6962 | 0.0002 | -0.1818 | 0.8558 | 0.6806  | 0.4961 |
| EDN1     | 3.8232  | 0.0001 | -0.4906 | 0.6237 | 0.5711  | 0.5679 |
| FKBP10   | -5.834  | 0      | 0.4657  | 0.6414 | -0.2216 | 0.8247 |
| PNPLA2   | -5.6973 | 0      | -0.3357 | 0.7371 | 1.0237  | 0.306  |
| HMGB1    | 6.6567  | 0      | 4.6831  | 0      | 3.5376  | 0.0004 |
| EIF5A    | 7.2855  | 0      | 3.7615  | 0.0002 | 3.1613  | 0.0016 |
| HLA-F    | -7.2573 | 0      | -6.5784 | 0      | -3.9923 | 0.0001 |
| ID1      | 9.364   | 0      | 6.1667  | 0      | 7.1053  | 0      |
| RPS17    | 5.7794  | 0      | 3.2817  | 0.001  | 3.6917  | 0.0002 |
| MAC30    | 9.2847  | 0      | 5.5652  | 0      | 6.3172  | 0      |
| na       | 7.8768  | 0      | 3.8669  | 0.0001 | 4.8177  | 0      |
| RPS7     | 6.2808  | 0      | 3.7017  | 0.0002 | 3.0942  | 0.002  |
| SNRPF    | 7.307   | 0      | 3.6993  | 0.0002 | 6.7327  | 0      |
| NACA     | 4.9271  | 0      | 3.0454  | 0.0023 | 3.7851  | 0.0002 |
| RAN      | 5.1057  | 0      | 3.5787  | 0.0003 | 5.2291  | 0      |
| PSMB7    | 5.8609  | 0      | 3.9266  | 0.0001 | 3.0104  | 0.0026 |
| PPP1CA   | 4.3714  | 0      | 3.2429  | 0.0012 | 4.2848  | 0      |
| CYC1     | 6.9219  | 0      | 3.177   | 0.0015 | 3.9262  | 0.0001 |
| CSE1L    | 6.41    | 0      | 3.6644  | 0.0002 | 3.5728  | 0.0004 |
| TMX2     | 3.8767  | 0.0001 | 3.4218  | 0.0006 | 3.2751  | 0.0011 |
| PSMC3    | 6.8244  | 0      | 3.9452  | 0.0001 | 5.6604  | 0      |
| HNRPAB   | 6.8461  | 0      | 5.4961  | 0      | 7.1291  | 0      |
| SPC18    | 7.0375  | 0      | 3.8425  | 0.0001 | 5.0668  | 0      |
| COPB     | 3.0961  | 0.002  | 3.0559  | 0.0022 | 3.4941  | 0.0005 |
| MCM3     | 3.3597  | 0.0008 | 3.395   | 0.0007 | 4.0378  | 0.0001 |
| DDX39    | 6.3836  | 0      | 4.1482  | 0      | 5.7005  | 0      |
| ACP1     | 4.7119  | 0      | 3.2696  | 0.0011 | 3.6308  | 0.0003 |
| MCM6     | 3.8726  | 0.0001 | 3.5921  | 0.0003 | 3.696   | 0.0002 |
| BIRC5    | 6.7654  | 0      | 4.3425  | 0      | 4.5886  | 0      |
| MCM2     | 4.8852  | 0      | 3.6042  | 0.0003 | 6.2653  | 0      |
| PTBP1    | 4.5812  | 0      | 4.2106  | 0      | 3.032   | 0.0024 |
| LSM3     | 4.7944  | 0      | 3.6028  | 0.0003 | 3.1396  | 0.0017 |
| PLK1     | 4.5197  | 0      | 5.6494  | 0      | 3.7058  | 0.0002 |
| C14orf2  | 4.9667  | 0      | 4.0877  | 0      | 3.6859  | 0.0002 |
| NDUFA1   | -4.8913 | 0      | -3.3873 | 0.0007 | -5.7732 | 0      |
| PMF1     | 3.0378  | 0.0024 | 3.8874  | 0.0001 | 3.4127  | 0.0006 |
| RANBP1   | 6.8503  | 0      | 4.1498  | 0      | 5.8988  | 0      |
| FOXM1    | 4.1285  | 0      | 3.6618  | 0.0003 | 3.2517  | 0.0011 |
| UBE2S    | 4.7223  | 0      | 3.6233  | 0.0003 | 3.2081  | 0.0013 |
| OGFR     | -6.5112 | 0      | -4.7722 | 0      | -4.0347 | 0.0001 |
| CDC20    | 5.7089  | 0      | 3.6241  | 0.0003 | 3.0198  | 0.0025 |
| SFRS3    | 4.7095  | 0      | 3.1164  | 0.0018 | 4.41    | 0      |
| UBE2C    | 6.3035  | 0      | 5.6216  | 0      | 5.0742  | 0      |
| TIMELESS | 4.8577  | 0      | 3.2564  | 0.0011 | 4.4032  | 0      |
| SPAG5    | 5.1485  | 0      | 4.5195  | 0      | 3.2977  | 0.001  |
| CDC2     | 4.6516  | 0      | 4.8968  | 0      | 3.7912  | 0.0001 |
| TMPO     | 5.3634  | 0      | 4.7044  | 0      | 4.1214  | 0      |

|          |         |        |         |        |         |        |
|----------|---------|--------|---------|--------|---------|--------|
| TPBG     | -4.2611 | 0      | -4.0609 | 0      | -4.6148 | 0      |
| SIVA     | 4.0921  | 0      | 5.2761  | 0      | 4.9445  | 0      |
| NDUFB5   | 3.5346  | 0.0004 | 3.2238  | 0.0013 | 3.1587  | 0.0016 |
| CXCL12   | 4.4811  | 0      | 5.3787  | 0      | 3.7453  | 0.0002 |
| RFC2     | 4.9317  | 0      | 3.803   | 0.0001 | 4.9122  | 0      |
| TRIP13   | 5.8402  | 0      | 3.8417  | 0.0001 | 4.605   | 0      |
| CDC45L   | 4.6797  | 0      | 3.9265  | 0.0001 | 4.2216  | 0      |
| FEN1     | 5.2114  | 0      | 4.8208  | 0      | 5.343   | 0      |
| FEN1     | 4.1838  | 0      | 3.2208  | 0.0013 | 5.3056  | 0      |
| ESPL1    | 4.1898  | 0      | 3.7215  | 0.0002 | 4.0968  | 0      |
| CCNF     | 4.0155  | 0.0001 | 4.5898  | 0      | 4.3332  | 0      |
| PRIM1    | 5.9948  | 0      | 5.1796  | 0      | 4.1768  | 0      |
| BARD1    | 4.7846  | 0      | 3.5752  | 0.0003 | 3.7181  | 0.0002 |
| HSU79266 | 4.6779  | 0      | 4.3086  | 0      | 3.9334  | 0.0001 |
| HIST1H4C | 9.8657  | 0      | 8.6091  | 0      | 8.7852  | 0      |
| KIAA0186 | 3.3559  | 0.0008 | 3.3475  | 0.0008 | 3.8671  | 0.0001 |
| HRMT1L2  | 5.0242  | 0      | 4.0673  | 0      | 4.1566  | 0      |
| CHC1     | 5.1646  | 0      | 4.615   | 0      | 3.6812  | 0.0002 |
| VCX2     | 3.0965  | 0.002  | 3.4165  | 0.0006 | 3.3952  | 0.0007 |
| PSMD9    | 4.3724  | 0      | 3.2531  | 0.0011 | 3.2883  | 0.001  |
| RNPS1    | 3.315   | 0.0009 | 3.3307  | 0.0009 | 3.0658  | 0.0022 |
| STK6     | 3.9702  | 0.0001 | 3.9979  | 0.0001 | 3.2708  | 0.0011 |
| ATP5G2   | 4.8186  | 0      | 4.0932  | 0      | 3.4382  | 0.0006 |
| MCM7     | 4.9039  | 0      | 3.8691  | 0.0001 | 3.3876  | 0.0007 |
| SNRPB    | 6.9458  | 0      | 4.9912  | 0      | 5.0743  | 0      |
| HINT1    | 3.7744  | 0.0002 | 3.0668  | 0.0022 | 4.6183  | 0      |
| VDAC3    | 4.4174  | 0      | 3.6998  | 0.0002 | 3.1133  | 0.0019 |
| TUBB2    | 4.3576  | 0      | 3.3511  | 0.0008 | 3.4963  | 0.0005 |
| DYRK1A   | 4.55    | 0      | 3.1201  | 0.0018 | 3.8522  | 0.0001 |
| PSMB8    | -4.211  | 0      | -3.8193 | 0.0001 | -3.2863 | 0.001  |
| HNRPDL   | 5.756   | 0      | 3.4801  | 0.0005 | 3.2161  | 0.0013 |
| AGR2     | 5.2593  | 0      | 3.5055  | 0.0005 | 5.9653  | 0      |
| MPDU1    | 3.0501  | 0.0023 | 3.1719  | 0.0015 | 4.1663  | 0      |
| KIF2C    | 4.9602  | 0      | 4.2061  | 0      | 3.8736  | 0.0001 |
| STRA13   | 8.6326  | 0      | 6.3755  | 0      | 9.0174  | 0      |
| PPT2     | -3.7464 | 0.0002 | -3.0791 | 0.0021 | -3.3831 | 0.0007 |
| CDKN3    | 6.3573  | 0      | 4.988   | 0      | 4.4855  | 0      |
| RRM2     | 8.2659  | 0      | 5.8086  | 0      | 7.1322  | 0      |
| TPX2     | 6.2011  | 0      | 3.278   | 0.001  | 4.3781  | 0      |
| BIRC5    | 5.4202  | 0      | 3.4891  | 0.0005 | 4.6905  | 0      |
| CDC2     | 6.1534  | 0      | 3.8304  | 0.0001 | 5.7798  | 0      |
| MCM7     | 5.7987  | 0      | 3.4019  | 0.0007 | 4.6722  | 0      |
| PTBP1    | 4.0319  | 0.0001 | 3.4888  | 0.0005 | 3.7692  | 0.0002 |
| FBL      | 6.2834  | 0      | 4.6692  | 0      | 4.2127  | 0      |
| KPNA2    | 5.8709  | 0      | 4.0645  | 0      | 3.2701  | 0.0011 |
| HNRPA3   | 6.1107  | 0      | 3.5124  | 0.0004 | 3.6     | 0.0003 |
| PTBP1    | 3.3602  | 0.0008 | 3.4601  | 0.0005 | 3.323   | 0.0009 |
| MKI67    | 3.9476  | 0.0001 | 3.3555  | 0.0008 | 3.3976  | 0.0007 |
| MKI67    | 4.6153  | 0      | 5.4642  | 0      | 5.4838  | 0      |

|             |         |        |         |        |         |        |
|-------------|---------|--------|---------|--------|---------|--------|
| MCM4        | 5.8829  | 0      | 3.577   | 0.0003 | 5.1814  | 0      |
| MAC30       | 7.2464  | 0      | 5.0957  | 0      | 6.7177  | 0      |
| MAC30       | 8.6894  | 0      | 5.6658  | 0      | 7.3204  | 0      |
| BOP1        | 3.7285  | 0.0002 | 3.035   | 0.0024 | 3.1634  | 0.0016 |
| na          | 4.0912  | 0      | 3.1783  | 0.0015 | 3.2172  | 0.0013 |
| HRAS        | 4.3076  | 0      | 3.3985  | 0.0007 | 5.1315  | 0      |
| FLJ10719    | 5.3027  | 0      | 3.5436  | 0.0004 | 3.1932  | 0.0014 |
| MTMR1       | 3.1411  | 0.0017 | 3.269   | 0.0011 | 3.3198  | 0.0009 |
| UBE2I       | 3.785   | 0.0002 | 3.3338  | 0.0009 | 3.6976  | 0.0002 |
| RBMX        | 3.9565  | 0.0001 | 3.2585  | 0.0011 | 3.816   | 0.0001 |
| FH          | 5.2471  | 0      | 3.7918  | 0.0001 | 4.2494  | 0      |
| SPDEF       | -3.0646 | 0.0022 | -3.7796 | 0.0002 | -4.7281 | 0      |
| GMPS        | 4.4641  | 0      | 4.1394  | 0      | 4.2031  | 0      |
| CCNB1       | 5.6827  | 0      | 3.1264  | 0.0018 | 3.7932  | 0.0001 |
| MCM5        | 5.3166  | 0      | 3.9828  | 0.0001 | 4.4554  | 0      |
| na          | 5.5076  | 0      | 3.2391  | 0.0012 | 3.3937  | 0.0007 |
| PTBP1       | 4.9358  | 0      | 3.067   | 0.0022 | 3.0689  | 0.0021 |
| AZGP1       | -6.1821 | 0      | -6.0958 | 0      | -5.9615 | 0      |
| COX7CP1     | 5.7235  | 0      | 3.0903  | 0.002  | 5.883   | 0      |
| DDX56       | 3.8857  | 0.0001 | 3.334   | 0.0009 | 4.4199  | 0      |
| BZW2        | 6.6708  | 0      | 4.5774  | 0      | 4.0779  | 0      |
| PRC1        | 6.2327  | 0      | 4.0132  | 0.0001 | 5.8302  | 0      |
| PCNT1       | 4.407   | 0      | 3.276   | 0.0011 | 3.2091  | 0.0013 |
| NUSAP1      | 6.1626  | 0      | 3.0238  | 0.0025 | 4.6618  | 0      |
| C11orf10    | 3.0192  | 0.0025 | 3.0342  | 0.0024 | 3.1926  | 0.0014 |
| C16orf33    | 7.1952  | 0      | 5.5959  | 0      | 4.9128  | 0      |
| NXT1        | 3.6149  | 0.0003 | 3.2924  | 0.001  | 3.5197  | 0.0004 |
| DKFZp762E13 | 3.4747  | 0.0005 | 3.3973  | 0.0007 | 3.0846  | 0.002  |
| POLR3K      | 4.1376  | 0      | 3.3916  | 0.0007 | 4.3975  | 0      |
| MLF1IP      | 4.6707  | 0      | 3.4074  | 0.0007 | 3.971   | 0.0001 |
| MRPL11      | 4.4745  | 0      | 4.2138  | 0      | 3.5605  | 0.0004 |
| SCUBE2      | -6.313  | 0      | -5.9831 | 0      | -6.1299 | 0      |
| SLC39A4     | 3.0542  | 0.0023 | 3.5692  | 0.0004 | 3.6604  | 0.0003 |
| C14orf169   | 4.1465  | 0      | 5.7068  | 0      | 4.3052  | 0      |
| RPL36       | 3.5069  | 0.0005 | 3.9149  | 0.0001 | 3.2731  | 0.0011 |
| NUSAP1      | 6.074   | 0      | 3.6785  | 0.0002 | 4.7206  | 0      |
| C14orf156   | 4.4869  | 0      | 3.2431  | 0.0012 | 3.3575  | 0.0008 |
| Pfs2        | 7.8096  | 0      | 5.0846  | 0      | 6.0992  | 0      |
| FLJ12748    | 4.2675  | 0      | 5.5868  | 0      | 5.3892  | 0      |
| MCM4        | 3.5202  | 0.0004 | 4.4771  | 0      | 3.9858  | 0.0001 |
| ARS2        | 4.6607  | 0      | 3.9253  | 0.0001 | 3.8514  | 0.0001 |
| SFN         | 7.1849  | 0      | 4.3762  | 0      | 5.7713  | 0      |
| SFN         | 6.6382  | 0      | 3.3944  | 0.0007 | 5.033   | 0      |
